# Supplementary material
Source: PubMed Central journal article supplement (PMC2775269)

# Supplemental Figure 1

**A**                      **Control**                      **+ BoNT/A 10 pM**                      **+ CAP 300 nM**

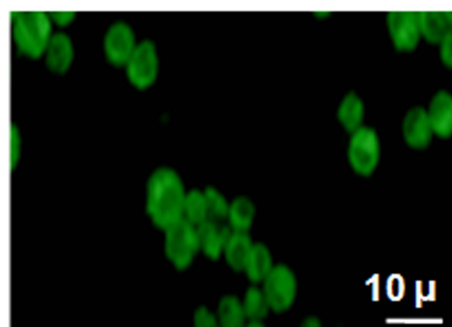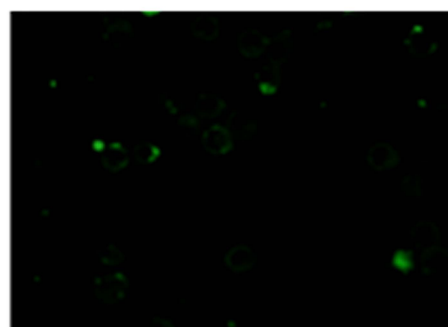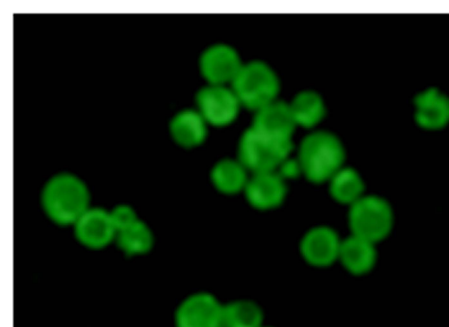

**B**                      **+ BoNT/A-Alexa 647**

**Brightfield**

**Control**

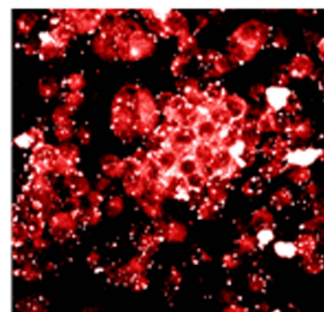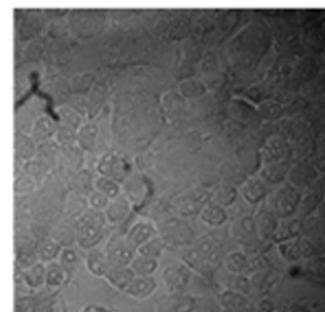

**+ CAP 300 nM**

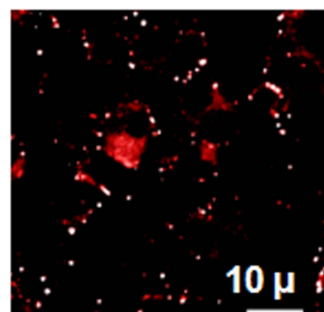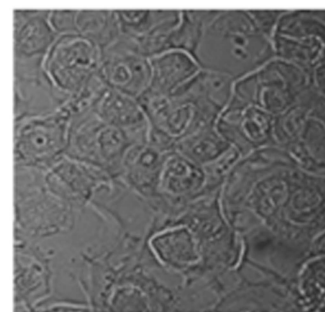

Supplement: supp_109.156901_JPER156901_SUPPLEMENTAL_FIGURE_1.pdf [file supp_109.156901_JPER156901_SUPPLEMENTAL_FIGURE_1.pdf]
